# Supplementary material for: Driving and cannabis use: a questionnaire about knowledge and behaviors after the legalization of recreational cannabis in California
Source: BMC Public Health. 2025 Sep 30;25:3219. doi: 10.1186/s12889-025-24309-4 (PMC12487619; doi:10.1186/s12889-025-24309-4)
Supplement: Supplementary file 2 — Supplementary Material 2. Appendix 1: Demographics of population by California census/target vs. demographics of unweighted/actual study population for screener questionnaire. Appendix 2: Demographics of census-weighted/target current users vs. demographics of unweighted/actual current users [file 12889_2025_24309_MOESM2_ESM.docx]

**Appendix**

Appendix 1: Demographics of population by California census/target vs. demographics of unweighted/actual study population for screener questionnaire

|  | **Target** | **Actual Screener**  **(n=15,309)** |  | **Target** | **Actual Screener**  **(n=15,309)** |
| --- | --- | --- | --- | --- | --- |
| **Age** | | | **Region** | | |
| 21-34 | 28% | 29% | **Northern Region** | | |
| 35-44 | 18% | 19% | Superior California | 8% | 9% |
| 45-54 | 17% | 17% | North Coast | 2% | 2% |
| 55+ | 37% | 34% |
| **Gender/Sex** |  |  | San Francisco Bay Area | 18% | 15% |
| Male | 49% | 48% |
| Female | 51% | 52% | **Central region** | | |
| **Ethnicity/Race** | | | Northern San Joaquin Valley | 5% | 4% |
| White non-Hispanic | 40% | 38% |
| Black non-Hispanic | 6% | 6% | Central Coast | 6% | 5% |
| Hispanic (all races) | 36% | 37% | Southern San Joaquin Valley | 7% | 7% |
| Asian/Pacific Islander | 16% | 15% | **Southern region** | | |
| Other | 2% | 2% | Inland Empire | 12% | 14% |
| **Annual Household Income** | | |
| <$50k | 26% | 26% | Los Angeles | 25% | 27% |
| $50k - $99k | 29% | 33% | Orange | 8% | 8% |
| $100k | 45% | 41% | San Diego - Imperial | 9% | 9% |

Appendix 2: Demographics of census-weighted/target current users vs. demographics of unweighted/actual current users

|  | **Target** | **Actual**  **Current Users**  **n=4,020** |  | **Target** | **Actual**  **Current Users**  **n=4,020** |
| --- | --- | --- | --- | --- | --- |
| **Age** | | | **Region** | | |
| 21-34 | 39% | 41% | **Northern Region** | | |
| 35-44 | 22% | 26% | Superior California | 8% | 9% |
| 45-54 | 18% | 16% | North Coast | 2% | 2% |
| 55+ | 21% | 17% |
| **Gender/Sex** |  |  | San Francisco Bay Area | 18% | 15% |
| Male | 59% | 50% |
| Female | 41% | 50% | **Central region** | | |
| **Ethnicity/Race** | | | Northern San Joaquin Valley | 5% | 4% |
| White non-Hispanic | 38% | 39% |
| Black non-Hispanic | 8% | 11% | Central Coast | 6% | 5% |
| Hispanic (all races) | 42% | 39% | Southern San Joaquin Valley | 7% | 7% |
| Asian/Pacific Islander | 10% | 9% | **Southern region** | | |
| Other | 2% | 3% | Inland Empire | 12% | 11% |
| **Annual Household Income** | | |
| <$50k | 24% | 34% | Los Angeles | 25% | 31% |
| $50k - $99k | 28% | 36% | Orange | 8% | 7% |
| $100k | 48% | 30% | San Diego - Imperial | 9% | 9% |
